# Supplementary material for: Mechanism of Pharmacological Action&nbsp;of Chromones in Radix Saposhnikoviae&nbsp;Based on Biological Significance of Secondary Metabolites
Source: Research Square preprint supplement (doi:10.21203/rs.3.rs-115050/v1), 2020-12-07
Supplement: Supplementary file 1 [file f8b125331024f96faf8bf979.docx]

**Materials and Methods**

Instruments and Reagents

UV-160A UV/VIS spectrophotometer (SHIMADZU, Japan)；K3 Microplate Reader (Thermo Fisher Instruments Co., Ltd., China); BSA224S-CW Electronic analytical balance (Sartorius Scientific Instruments Co., Ltd)；A11618 Electronic thermometer (Guang Dong Tonze Electric Co.,Ltd )；XL-90 Low temperature centrifuge (Beckman, USA)；Micropipette (Thermo Fisher Instruments Co., Ltd, China)；YLS-6B Intelligent hot plate instrument (Jinan Yiyan Science and Technology Development Co., Ltd, China); HH-2 Digital Display Constant Temperature Water Bath (Jiangsu Jintan ronghua Instrument Manufacturing Co., Ltd, China); KQ2200E Ultrasonic cleaner (Kunshan Ultrasonic Instrument Co., Ltd, China); Milli-Q Integral 5 Ultra-pure water system (Merk Millipore, German); FP240h Constant temperature drying oven (Binder, German).High activity dry yeast (Product license number：SC2115042600158，Angel Yeast Co., Ltd.). Cimifugin（Batch number: S-007-150421, purchased from Chengdu Herbpurify Co., Ltd., with purity of 98% above). Protein quantitative Kit (A045-2), POD Kit (A084-1), CAT test Kit and H2O2 test Kit (purchased from Nanjing Jiancheng Bioengineering Research Institute). Sodium chloride injection（Batch number: 170109D1, Harbin Medisan Pharmaceutical Co., Ltd.). Methanol, xylene, vaseline and other reagents are analytical pure.

Animals

KM mice, with weight of 18-22g, half male and half female (Animal Certificate No: SYXK (Hei) 2010001); SPF level SD rats, male, with body weight of 180-220g (license No: SCXK (Hei)2019-0006), all purchased from Safety Evaluation Center of Heilongjiang University of Traditional Chinese Medicine. All the experimental animals were fed in the laboratory for 3 days, keeping the experimental environment quiet, good ventilation, cage clean, with room temperature (22 ± 2) ℃ and humidity (60 ± 10)%.The experimental protocol were reviewed and approved by the Ethical Committee of Heilongjiang University of Chinese Medicine (approval number: HUCM2018-08598) and was conducted according to the principles expressed in the Declaration of Helsinki.

Antipyretic Effect of Cimifugin

**Animal Screening and Modeling.** The basic body temperature of SPF male SD rats was measured after 3 days of adaptive feeding. The rats whose body temperature was more than 39.0 ℃ or whose twice body temperature fluctuations were more than 0.5℃ were eliminated. Finally, 20 SD rats were selected as qualified experimental animals for modeling.

**Temperature monitoring of rats.** The qualified experimental animals were divided into experimental group (15 animals) and model group (5 animals). The rats were forbidden to feed but not drink for 12 h before the experiment, and the average temperature was measured at an interval of 15 minutes for three times as the normal temperature before modeling, and the temperature was monitored at an interval of 1 hour from 0 h to 22 h after administration.

**Determination of antipyretic effect of Cimifugin.** The experimental groups were injected with 0.216mg/kg of Cimifugin solution by tail vein at 0 h and 6 hours, respectively. The model group was given the same volume of normal saline. 20% dry yeast suspension was injected subcutaneously into the back after the first injecting Cimifugin solution half an hour later. The antipyretic effect (△t) of Cimifugin was calculated with change of the body temperature for 6 h and 8 h after administration.

The antipyretic effect △T（℃）= T8h-T6h

The serum of rats was collected before administrate drug (0 h) and at 8 h after administrate drug for testing POD and CAT activities.

The Relationship between Fever and H2O2 in Rats

Five rats of the model group were selected to measure the contents of H2O2 andbody temperature at 0h, 8h and 22h. Hydrogen peroxide (H2O2) content was determined with hydrogen peroxide (H2O2) kit.

Determination of CAT and POD activity

CAT activity was detected by Catalase (CAT) kit. The amount of substance (1 μmol) decomposing substrate (H2O2) per ml of serum was used as one activity unit (U / ml). POD activity was measured by POD kit, and the amount of substance (1 μg) per mg of tissue protein (serum protein) was used as one activity unit (U / mgprot).

**Determination of Optimum Temperature of POD and CAT**

Blood was collected from 5 rats, and the serum was mixed equally, the activities of POD and CAT were measured at 37.0 ℃, 37.5 ℃, 38.0 ℃, 38.5 ℃, 39.0 ℃, 39.5 ℃, 40.0 ℃, 40.5 ℃, and 41.0 ℃, respectively.

**Analgesic Effect of Cimifugin**

**Screening of experimental animals and determination of** **average pain threshold.** Before the experiment, 30 KM female mice were screened. The pain threshold was determined by hot plate method. The temperature of hot plate was set at 55 ℃. Fifteen mice with pain threshold from 5s to 30s were selected as qualified experimental animals. The average pain threshold (s) was measured before the experiment.

**Determination of POD activity and analgesic effect.** The serum of 15 mice was collected before administration for the determination of POD activities. The pain threshold was measured 1 hour after 0.5mg/kg dosage of cimifugin solution was administrated through tail vein. Each mouse was measured for more than 30s. The average value of three times was used as the indication of the analgesic effect

Analgesic effect (s) = average pain threshold after administration (s) - average pain threshold before administration (s).

**Anti-inflammatory Effect of Cimifugin**

Serum samples of 15 KM mice, half male and half female, were collected before administration for determination of POD activities. Cimicifugin was given by tail vein at the dose of 0.5mg/kg. After 30 minutes, both sides of the left ear of each mouse was coated 0.2ml xylene, and the right ear was used as control. One hour later, the mice were killed by cervical dislocation. Two ears were cut along the base line of the auricle respectively. Round ear pieces were made on the same part of the left and right ears with an 8mm diameter punch and were weighed. The weight difference between the two ear pieces of the same mouse was taken as the indication of the auricle swelling degree (mg).

Auricle swelling degree (mg)=Weight of left ear(mg)- Weight of right ear(mg)

**Data Processing**

Taking the activities of serum antioxidant enzymes (POD, CAT) and the contents of H2O2 in serum as the X-axis, and the pharmacological action as Y-axis, the correlation between the activities of serum antioxidant enzymes (POD, CAT) and H2O2 contents in serum and pharmacological action was analyzed by Microsoft Excel software.
